# Supplementary material for: Highly efficient n-type PbTe developed by advanced electronic structure engineering
Source: Royal Society of Chemistry journal article supplement (doi:10.1039/d0tc03067h), 2020-01-01
Supplement: d0tc03067h1.pdf [file d0tc03067h1.pdf]

## Supplementary information

### High-efficient *n*-type PbTe developed by advanced electronic structure engineering

Krzysztof T. Wojciechowski<sup>1</sup>, Taras Parashchuk<sup>2,\*</sup>, Bartłomiej Wiendlocha<sup>3</sup>,

Oleksandr Cherniushok<sup>1</sup>, Zinovi Dashevsky<sup>4</sup>

<sup>1</sup>Thermoelectric Research Laboratory, Faculty of Material Science and Ceramics, AGH University of Science and Technology, Mickiewicza 30, 30-059 Krakow, Poland

<sup>2</sup>The Lukasiewicz Research Network – Krakow Institute of Technology, Zakopianska 73, 30-418 Krakow, Poland

<sup>3</sup>Faculty of Physics and Applied Computer Science, AGH University of Science and Technology, A. Mickiewicza 30, 30-059 Krakow, Poland

<sup>4</sup>Department of Materials Engineering, Ben-Gurion University of the Negev, Beer-Sheva 84105, Israel

\*Corresponding author: taras.parashchuk@kit.lukasiewicz.gov.pl

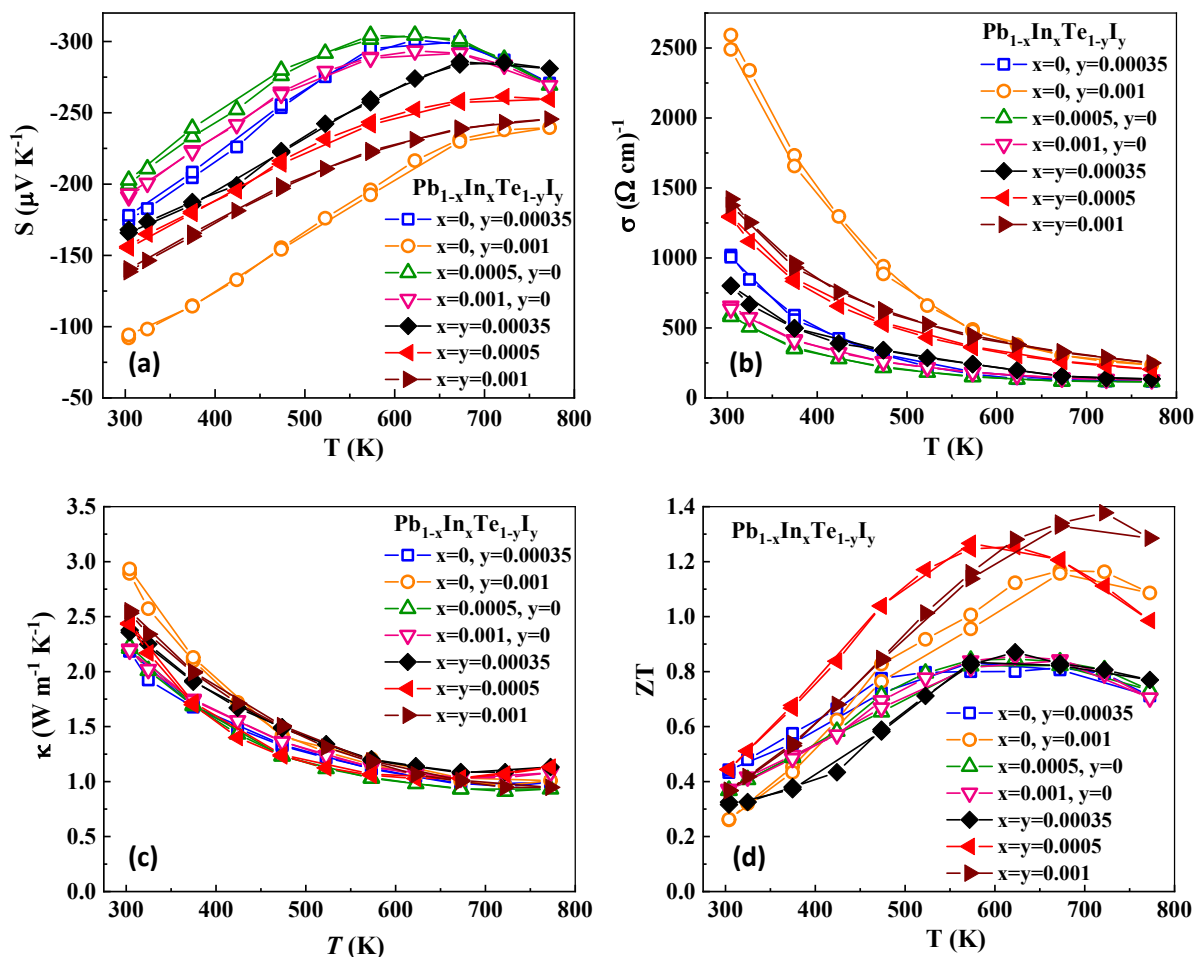

**Fig. S1.** Heating and cooling of Seebeck coefficient (a), electrical conductivity (b), power factor (c) and dimensionless figure of merit  $ZT$  (d) as a function of temperature for  $\text{Pb}_{1-x}\text{In}_x\text{Te}_{1-y}\text{I}_y$ .

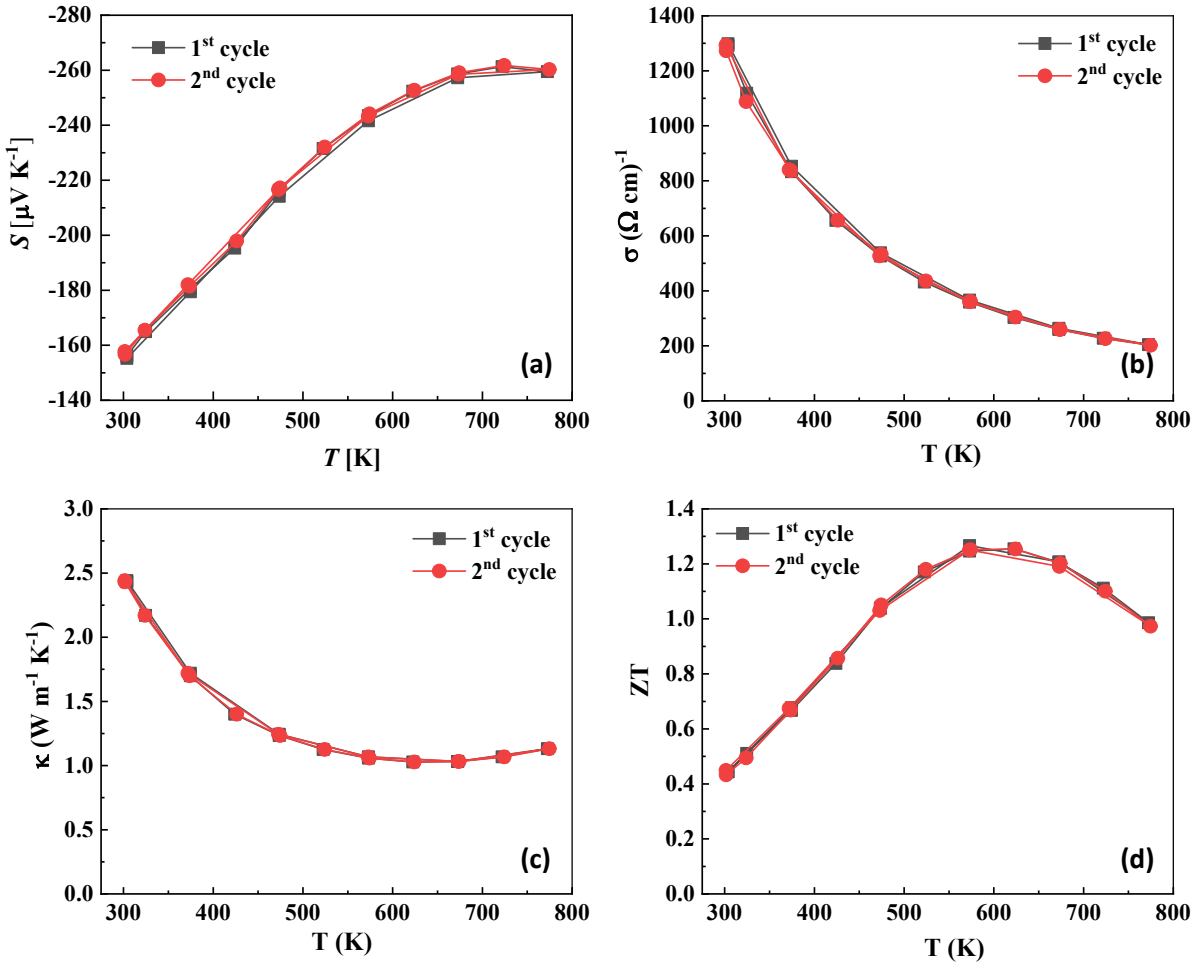

**Fig. S2.** Cycle measurements of Seebeck coefficient (a), electrical conductivity (b), power factor (c) and dimensionless figure of merit  $ZT$  (d) as a function of temperature for  $\text{Pb}_{1-x}\text{In}_x\text{Te}_{1-y}\text{I}_y$  ( $x = y = 0.0005$ ) sample.
